# Supplementary material for: Models of Cultural Niche Construction with Selection and Assortative Mating
Source: PLoS One. 2012 Aug 14;7(8):e42744. doi: 10.1371/journal.pone.0042744 (PMC3419226; doi:10.1371/journal.pone.0042744)
Supplement: Text S1 — Recursions. Equations A1–A4 describe the relationship between the phenotype frequencies in the current generation, xi, and those in the next generation, . The average fitness () is the sum of the right side of these four equations and acts to normalize so that . (DOC) [file pone.0042744.s001.doc]

**Text S1: Recursions**

(A1)

(A2)

(A3)

(A4)
